# Supplementary material for: Photoelectron spectroscopic and computational study of the PtMgH3,5− cluster anions
Source: Royal Society of Chemistry journal article supplement (doi:10.1039/c6cp03243e), 2016-01-01
Supplement: c6cp03243e1.pdf [file c6cp03243e1.pdf]

## Supporting Information for

# Photoelectron Spectroscopic and Computational Study of the PtMgH<sub>3</sub>, 5<sup>-</sup> Cluster Anions

Xinxing Zhang,<sup>1</sup> Gerd Ganteför,<sup>1</sup> Anastassia N. Alexandrova<sup>2</sup> and Kit Bowen,<sup>1\*</sup>

<sup>1</sup> Department of Chemistry, Johns Hopkins University, Baltimore, Maryland 21218, USA

<sup>2</sup> Department of Chemistry and Biochemistry, University of California, Los Angeles, Los Angeles,  
California, 90095. California NanoSystems Institute, 570 Westwood Plaza, Building 114, Los  
Angeles, CA 90095.

\* Electronic mail: [kbowen@jhu.edu](mailto:kbowen@jhu.edu)

PtMgH<sub>3</sub><sup>-</sup> coordinates (Å):

|    |             |             |             |
|----|-------------|-------------|-------------|
| Pt | -0.32826400 | 0.01923000  | -0.00060900 |
| Mg | 2.22812700  | 0.00120000  | 0.00330600  |
| H  | -0.84623700 | -1.56060400 | 0.10684500  |
| H  | -0.40749900 | 1.63924400  | 0.00305600  |
| H  | 0.12076200  | -1.59295000 | -0.10207500 |

PtMgH<sub>3</sub> coordinates (Å):

|    |             |             |             |
|----|-------------|-------------|-------------|
| Pt | -0.30748700 | 0.03352800  | 0.00000300  |
| Mg | 2.13036800  | -0.10043200 | -0.00001800 |
| H  | -0.97078700 | -1.45589900 | 0.45780100  |
| H  | 0.36212700  | 1.50147700  | 0.00001600  |
| H  | -0.97180800 | -1.45555200 | -0.45787300 |

PtMgH<sub>5</sub><sup>-</sup> coordinates (Å):

|    |             |             |             |
|----|-------------|-------------|-------------|
| Pt | 0.32507500  | 0.00001700  | 0.00003600  |
| Mg | -2.26989000 | -0.00014100 | -0.00009100 |
| H  | 0.37455400  | 1.52821200  | 0.53363500  |
| H  | 0.37627700  | -0.03599900 | 1.61835300  |
| H  | 0.37730300  | 0.98019200  | -1.28809200 |
| H  | 0.37757100  | -1.55046000 | 0.46500900  |
| H  | 0.37711700  | -0.92158700 | -1.33064600 |

PtMgH<sub>5</sub> coordinates (Å):

|    |             |             |             |
|----|-------------|-------------|-------------|
| Pt | -0.30602000 | -0.00008300 | 0.00001800  |
| Mg | 2.12429100  | 0.00053500  | -0.00011500 |
| H  | -0.32868100 | 1.59760400  | -0.25874200 |
| H  | -0.32552500 | 0.24789200  | -1.59957200 |
| H  | -0.32511800 | 0.74023500  | 1.43948300  |
| H  | -0.32141200 | -1.44495500 | -0.72982500 |
| H  | -0.32121600 | -1.14071000 | 1.14860900  |
